# Supplementary material for: Интегрированная технология профессиональной подготовки магистров для высокотехнологичных предприятий электроэнергетического кластера
Source: Royal Society of Chemistry journal article supplement (doi:10.1039/d3dt00490b), 2012-01-01
Supplement: d3dt00490b1.pdf [file d3dt00490b1.pdf]

## Electronic Supplementary Information

# Syntheses, Structures, photoelectric properties and photocatalysis of iodobismuthate hybrids with lanthanide complex cations

Jiahua Zhang, Xiao Yang, Taohong Ren and Dingxian Jia\*

*College of Chemistry, Chemical Engineering and Materials Science, Soochow University, Suzhou 215123, People's Republic of China.*

## Table of Contents

|                                                                                                                                                                                                                                                                             |     |
|-----------------------------------------------------------------------------------------------------------------------------------------------------------------------------------------------------------------------------------------------------------------------------|-----|
| <b>Table S1.</b> Crystallographic data for <b>1</b> , <b>2</b> and <b>3</b> .....                                                                                                                                                                                           | S2  |
| <b>Table S2.</b> Selected bond lengths (Å) and angles (deg) for <b>1</b> .....                                                                                                                                                                                              | S3  |
| <b>Table S3.</b> Selected bond lengths (Å) and angles (deg) for <b>2</b> .....                                                                                                                                                                                              | S4  |
| <b>Table S4.</b> Selected bond lengths (Å) and angles (deg) for <b>3</b> .....                                                                                                                                                                                              | S5  |
| <b>Table S5.</b> Hydrogen Bond Lengths (Å) and Angles (deg) for <b>1</b> .....                                                                                                                                                                                              | S8  |
| <b>Table S6.</b> Hydrogen Bond Lengths (Å) and Angles (deg) for <b>2</b> .....                                                                                                                                                                                              | S8  |
| <b>Table S7.</b> Hydrogen Bond Lengths (Å) and Angles (deg) for <b>3</b> .....                                                                                                                                                                                              | S9  |
| <b>Table S8.</b> Summary of Catalytic Activities of Some Iodobismuthate Hybrids with Different Cations in Photodegradation of Organic .....                                                                                                                                 | S10 |
| <b>Fig. S1</b> IR spectrum of <b>1</b> . .....                                                                                                                                                                                                                              | S11 |
| <b>Fig. S2</b> IR spectrum of <b>2</b> . .....                                                                                                                                                                                                                              | S11 |
| <b>Fig. S3</b> IR spectrum of <b>3</b> . .....                                                                                                                                                                                                                              | S11 |
| <b>Fig. S4</b> Structural diagrams for <b>2</b> : (a) [Eu(DMF) <sub>8</sub> ] <sup>3+</sup> cation, (b) distorted bicapped triangular prism EuO <sub>8</sub> of [Eu(DMF) <sub>8</sub> ] <sup>3+</sup> , and (c) [Bi <sub>2</sub> I <sub>9</sub> ] <sup>3-</sup> anion. .... | S12 |
| <b>Fig. S5</b> Structural diagrams of [Tb(DMF) <sub>8</sub> ] <sup>3+</sup> cations (a, b), and [Bi <sub>2</sub> I <sub>9</sub> ] <sup>3-</sup> anions (c) for <b>3</b> . .....                                                                                             | S12 |
| <b>Fig. S6</b> Distorted square antiprisms TbO <sub>8</sub> of [Tb(1)(DMF) <sub>8</sub> ] <sup>3+</sup> (a), and [Tb(2)(DMF) <sub>8</sub> ] <sup>3+</sup> (b) in compound <b>3</b> . ....                                                                                   | S13 |
| <b>Fig. S7</b> Photocurrent responses of four successive measurements on compounds <b>1</b> (a), <b>2</b> (b), and <b>3</b> (c). .....                                                                                                                                      | S13 |
| <b>Fig. S8</b> Cyclic voltammograms of blank (a), and compound <b>1</b> (b) in DMF solution with a scan rate of 50 mV/s. ....                                                                                                                                               | S14 |
| <b>Fig. S9</b> Time dependent absorption spectra of RhB solutions in photodegradation reactions over compounds <b>1</b> (a), <b>2</b>                                                                                                                                       |     |

(b) and **3** (c). .....S14

**Fig. S10** Simulated and experimental powder XRD patterns, and experimental powder XRD pattern after photocatalysis for compound **1** (a), **2** (b) and **3**(c). .....S15

**Fig. S11.** Time dependent absorption spectra of CV solution with photodegradation catalyzed by compound **2** in the presence of radical quenching agents BQ (a), AO (b), and TBA (c).  
.....S16

**Fig. S12.** Time dependent absorption spectra of CV solution with photodegradation catalyzed by compound **3** in the presence of radical quenching agents BQ (a), AO (b), and TBA (c).  
.....S16

**Fig. S13.** Schematic diagrams illustrating the photocatalytic mechanism for CV degradation over **2** (a) and **3** (b) under visible light irradiation. ....S17

**Table S1.** Crystallographic data for **1**, **2** and **3**

|                                                             | <b>1</b>                                                                                       | <b>2</b>                                                                                       | <b>3</b>                                                                                                         |
|-------------------------------------------------------------|------------------------------------------------------------------------------------------------|------------------------------------------------------------------------------------------------|------------------------------------------------------------------------------------------------------------------|
| Empirical formula                                           | C <sub>24</sub> H <sub>56</sub> O <sub>8</sub> N <sub>8</sub> LaBi <sub>2</sub> I <sub>9</sub> | C <sub>24</sub> H <sub>56</sub> O <sub>8</sub> N <sub>8</sub> EuBi <sub>2</sub> I <sub>9</sub> | C <sub>48</sub> H <sub>112</sub> O <sub>16</sub> N <sub>16</sub> Tb <sub>4</sub> Bi <sub>2</sub> I <sub>18</sub> |
| Formula weight                                              | 2283.73                                                                                        | 2296.78                                                                                        | 4607.49                                                                                                          |
| Cryst syst                                                  | triclinic                                                                                      | monoclinic                                                                                     | monoclinic                                                                                                       |
| Space group                                                 | <i>P</i> $\bar{1}$                                                                             | <i>P</i> 2 <sub>1</sub> / <i>c</i>                                                             | <i>P</i> 2 <sub>1</sub> / <i>n</i>                                                                               |
| <i>a</i> (Å)                                                | 13.3790(10)                                                                                    | 9.9686(14)                                                                                     | 15.178(13)                                                                                                       |
| <i>b</i> (Å)                                                | 14.8016(12)                                                                                    | 22.306(4)                                                                                      | 22.45(2)                                                                                                         |
| <i>c</i> (Å)                                                | 15.5176(17)                                                                                    | 26.361(4)                                                                                      | 33.98(3)                                                                                                         |
| $\alpha$ (deg)                                              | 88.113(7)                                                                                      | 90                                                                                             | 90                                                                                                               |
| $\beta$ (deg)                                               | 78.328(6)                                                                                      | 97.401(5)                                                                                      | 95.06(3)                                                                                                         |
| $\gamma$ (deg)                                              | 71.994(6)                                                                                      | 90                                                                                             | 90                                                                                                               |
| <i>V</i> (Å <sup>3</sup> )                                  | 2860.6(5)                                                                                      | 5812.8(15)                                                                                     | 11534(18)                                                                                                        |
| <i>Z</i>                                                    | 2                                                                                              | 4                                                                                              | 4                                                                                                                |
| <i>T</i> (K)                                                | 223(2)                                                                                         | 293(2)                                                                                         | 293(2)                                                                                                           |
| 2 $\theta$ (max) (deg)                                      | 50.70                                                                                          | 50.70                                                                                          | 50.00                                                                                                            |
| Total reflections                                           | 22966                                                                                          | 73659                                                                                          | 188114                                                                                                           |
| Unique reflections                                          | 10384                                                                                          | 10546                                                                                          | 20277                                                                                                            |
| <i>R</i> <sub>int</sub>                                     | 0.0557                                                                                         | 0.0776                                                                                         | 0.0891                                                                                                           |
| Reflections with [ <i>I</i> > 2 $\sigma$ ( <i>I</i> )]      | 7957                                                                                           | 9882                                                                                           | 17049                                                                                                            |
| No. of parameters                                           | 486                                                                                            | 425                                                                                            | 883                                                                                                              |
| <i>R</i> <sub>1</sub> [ <i>I</i> > 2 $\sigma$ ( <i>I</i> )] | 0.0423                                                                                         | 0.0407                                                                                         | 0.0672                                                                                                           |

|                                   |               |               |               |
|-----------------------------------|---------------|---------------|---------------|
| $wR_2 [I > 2\sigma(I)]$           | 0.0758        | 0.1236        | 0.1519        |
| $\Delta\rho / e \text{ \AA}^{-3}$ | 2.089/ -2.414 | 1.965/ -2.174 | 3.149/ -2.537 |
| GOF on $F^2$                      | 0.899         | 1.099         | 1.160         |

**Table S2.** Selected bond lengths (Å) and angles (°) for **1**.

|                 |            |                 |            |
|-----------------|------------|-----------------|------------|
| La(1)–O(1)      | 2.493(8)   | La(1)–O(2)      | 2.435(6)   |
| La(1)–O(3)      | 2.505(6)   | La(1)–O(4)      | 2.460(7)   |
| La(1)–O(5)      | 2.496(6)   | La(1)–O(6)      | 2.502(9)   |
| La(1)–O(7)      | 2.536(6)   | La(1)–O(8)      | 2.431(6)   |
| Bi(1)–I(1)      | 3.2289(8)  | Bi(1)–I(2)      | 3.2255(8)  |
| Bi(1)–I(3)      | 3.2365(7)  | Bi(1)–I(4)      | 2.9628(8)  |
| Bi(1)–I(5)      | 2.9461(7)  | Bi(1)–I(6)      | 2.9927(8)  |
| Bi(2)–I(1)      | 3.2134(7)  | Bi(2)–I(2)      | 3.1661(8)  |
| Bi(2)–I(3)      | 3.2464(9)  | Bi(2)–I(7)      | 2.9418(10) |
| Bi(2)–I(8)      | 3.0272(7)  | Bi(2)–I(9)      | 2.9619(7)  |
|                 |            |                 |            |
| O(1)–La(1)–O(2) | 75.6(3)    | O(1)–La(1)–O(3) | 75.5(2)    |
| O(1)–La(1)–O(4) | 74.0(3)    | O(1)–La(1)–O(5) | 143.7(2)   |
| O(1)–La(1)–O(6) | 137.3(2)   | O(1)–La(1)–O(7) | 121.6(3)   |
| O(1)–La(1)–O(8) | 70.3(2)    | O(2)–La(1)–O(3) | 76.8(2)    |
| O(2)–La(1)–O(4) | 144.3(3)   | O(2)–La(1)–O(5) | 115.6(3)   |
| O(2)–La(1)–O(6) | 70.7(3)    | O(2)–La(1)–O(7) | 139.7(3)   |
| O(2)–La(1)–O(8) | 85.8(2)    | O(3)–La(1)–O(4) | 77.8(2)    |
| O(3)–La(1)–O(5) | 74.2(2)    | O(3)–La(1)–O(6) | 119.9(3)   |
| O(3)–La(1)–O(7) | 139.9(2)   | O(3)–La(1)–O(8) | 144.5(2)   |
| O(4)–La(1)–O(5) | 80.5(3)    | O(4)–La(1)–O(6) | 144.7(3)   |
| O(4)–La(1)–O(7) | 73.9(3)    | O(4)–La(1)–O(8) | 100.9(2)   |
| O(5)–La(1)–O(6) | 76.4(3)    | O(5)–La(1)–O(7) | 73.6(2)    |
| O(5)–La(1)–O(8) | 141.2(2)   | O(6)–La(1)–O(7) | 74.2(3)    |
| O(6)–La(1)–O(8) | 81.6(3)    | O(7)–La(1)–O(8) | 69.8(2)    |
| I(1)–Bi(1)–I(2) | 81.00(2)   | I(1)–Bi(1)–I(3) | 83.44(2)   |
| I(1)–Bi(1)–I(4) | 171.70(2)  | I(1)–Bi(1)–I(5) | 91.26(2)   |
| I(1)–Bi(1)–I(6) | 90.92(2)   | I(2)–Bi(1)–I(3) | 80.711(19) |
| I(2)–Bi(1)–I(4) | 91.25(2)   | I(2)–Bi(1)–I(5) | 93.34(2)   |
| I(2)–Bi(1)–I(6) | 170.43(2)  | I(3)–Bi(1)–I(4) | 92.44(2)   |
| I(3)–Bi(1)–I(5) | 172.56(3)  | I(3)–Bi(1)–I(6) | 93.35(2)   |
| I(4)–Bi(1)–I(5) | 92.14(2)   | I(4)–Bi(1)–I(6) | 96.52(3)   |
| I(5)–Bi(1)–I(6) | 91.94(2)   | I(1)–Bi(2)–I(2) | 82.145(19) |
| I(1)–Bi(2)–I(3) | 83.53(2)   | I(1)–Bi(2)–I(7) | 90.92(2)   |
| I(1)–Bi(2)–I(8) | 87.787(19) | I(1)–Bi(2)–I(9) | 175.38(2)  |
| I(2)–Bi(2)–I(3) | 81.45(2)   | I(2)–Bi(2)–I(7) | 93.43(2)   |
| I(2)–Bi(2)–I(8) | 166.75(2)  | I(2)–Bi(2)–I(9) | 94.29(2)   |

|                  |            |                  |            |
|------------------|------------|------------------|------------|
| I(3)–Bi(2)–I(7)  | 172.90(2)  | I(3)–Bi(2)–I(8)  | 88.90(2)   |
| I(3)–Bi(2)–I(9)  | 93.06(2)   | I(7)–Bi(2)–I(8)  | 95.34(3)   |
| I(7)–Bi(2)–I(9)  | 92.23(3)   | I(8)–Bi(2)–I(9)  | 95.28(2)   |
| Bi(1)–I(1)–Bi(2) | 81.381(18) | Bi(1)–I(2)–Bi(2) | 82.158(18) |
| Bi(1)–I(3)–Bi(2) | 80.765(19) |                  |            |

**Table S3.** Selected bond lengths (Å) and angles (°) for **2**.

|                  |           |                  |           |
|------------------|-----------|------------------|-----------|
| Eu(1)–O(1)       | 2.423(7)  | Eu(1)–O(2)       | 2.384(7)  |
| Eu(1)–O(3)       | 2.382(7)  | Eu(1)–O(4)       | 2.414(9)  |
| Eu(1)–O(5)       | 2.422(7)  | Eu(1)–O(6)       | 2.344(7)  |
| Eu(1)–O(7)       | 2.378(9)  | Eu(1)–O(8)       | 2.448(7)  |
| Bi(1)–I(1)       | 3.2069(8) | Bi(1)–I(2)       | 3.3046(8) |
| Bi(1)–I(3)       | 3.2348(8) | Bi(1)–I(4)       | 2.9792(8) |
| Bi(1)–I(5)       | 2.9405(9) | Bi(1)–I(6)       | 2.9760(9) |
| Bi(2)–I(1)       | 3.1664(7) | Bi(2)–I(2)       | 3.2374(8) |
| Bi(2)–I(3)       | 3.2565(8) | Bi(2)–I(7)       | 2.9676(8) |
| Bi(2)–I(8)       | 2.9596(8) | Bi(2)–I(9)       | 3.0025(8) |
|                  |           |                  |           |
| O(1)–Eu(1)–O(2)  | 75.5(3)   | O(1)–Eu(1)–O(3)  | 72.6(2)   |
| O(1)–Eu(1)–O(4)  | 130.2(4)  | O(1)–Eu(1)–O(5)  | 130.8(3)  |
| O(1)–Eu(1)–O(6)  | 142.4(2)  | O(1)–Eu(1)–O(7)  | 76.2(3)   |
| O(1)–Eu(1)–O(8)  | 72.5(2)   | O(2)–Eu(1)–O(3)  | 95.7(3)   |
| O(2)–Eu(1)–O(4)  | 72.9(3)   | O(2)–Eu(1)–O(5)  | 145.0(3)  |
| O(2)–Eu(1)–O(6)  | 90.4(3)   | O(2)–Eu(1)–O(7)  | 141.4(3)  |
| O(2)–Eu(1)–O(8)  | 74.9(3)   | O(3)–Eu(1)–O(4)  | 73.4(3)   |
| O(3)–Eu(1)–O(5)  | 76.1(3)   | O(3)–Eu(1)–O(6)  | 144.5(2)  |
| O(3)–Eu(1)–O(7)  | 100.4(3)  | O(3)–Eu(1)–O(8)  | 145.1(2)  |
| O(4)–Eu(1)–O(5)  | 72.2(3)   | O(4)–Eu(1)–O(6)  | 75.1(3)   |
| O(4)–Eu(1)–O(7)  | 145.5(3)  | O(4)–Eu(1)–O(8)  | 131.8(3)  |
| O(5)–Eu(1)–O(6)  | 79.0(2)   | O(5)–Eu(1)–O(7)  | 73.4(3)   |
| O(5)–Eu(1)–O(8)  | 129.8(3)  | O(6)–Eu(1)–O(7)  | 96.2(3)   |
| O(6)–Eu(1)–O(8)  | 70.1(2)   | O(7)–Eu(1)–O(8)  | 71.8(3)   |
| Bi(1)–I(1)–Bi(2) | 83.23(2)  | Bi(1)–I(2)–Bi(2) | 80.63(2)  |
| Bi(1)–I(3)–Bi(2) | 81.39(2)  | I(1)–Bi(1)–I(3)  | 80.71(2)  |
| I(1)–Bi(1)–I(2)  | 83.45(2)  | I(1)–Bi(1)–I(5)  | 88.39(2)  |
| I(1)–Bi(1)–I(4)  | 91.42(2)  | I(2)–Bi(1)–I(3)  | 79.77(2)  |
| I(1)–Bi(1)–I(6)  | 171.74(2) | I(2)–Bi(1)–I(5)  | 171.84(2) |
| I(2)–Bi(1)–I(4)  | 85.89(2)  | I(3)–Bi(1)–I(4)  | 164.31(2) |
| I(2)–Bi(1)–I(6)  | 97.54(3)  | I(3)–Bi(1)–I(6)  | 91.38(3)  |
| I(3)–Bi(1)–I(5)  | 99.35(3)  | I(4)–Bi(1)–I(6)  | 96.83(2)  |
| I(4)–Bi(1)–I(5)  | 93.94(3)  | I(1)–Bi(2)–I(2)  | 85.19(2)  |
| I(5)–Bi(1)–I(6)  | 90.59(3)  | I(1)–Bi(2)–I(7)  | 85.03(2)  |

|                 |           |                 |           |
|-----------------|-----------|-----------------|-----------|
| I(1)–Bi(2)–I(3) | 80.98(2)  | I(1)–Bi(2)–I(9) | 174.63(2) |
| I(1)–Bi(2)–I(8) | 92.28(2)  | I(2)–Bi(2)–I(7) | 92.09(2)  |
| I(2)–Bi(2)–I(3) | 80.45(2)  | I(2)–Bi(2)–I(9) | 89.68(2)  |
| I(2)–Bi(2)–I(8) | 171.82(2) | I(3)–Bi(2)–I(8) | 91.48(2)  |
| I(3)–Bi(2)–I(7) | 164.62(2) | I(7)–Bi(2)–I(8) | 95.45(2)  |
| I(3)–Bi(2)–I(9) | 99.77(2)  | I(8)–Bi(2)–I(9) | 93.02(3)  |
| I(7)–Bi(2)–I(9) | 93.58(2)  |                 |           |

**Table S4.** Selected bond lengths (Å) and angles (°) for **3**.

|                  |           |                  |           |
|------------------|-----------|------------------|-----------|
| Bi(1)–I(1)       | 3.224(2)  | Bi(1)–I(2)       | 3.279(2)  |
| Bi(1)–I(3)       | 3.221(3)  | Bi(1)–I(4A)      | 2.993(3)  |
| Bi(1)–I(4B)      | 2.952(16) | Bi(1)–I(5A)      | 2.949(3)  |
| Bi(1)–I(5B)      | 3.118(16) | Bi(1)–I(6)       | 2.951(2)  |
| Bi(2)–I(1)       | 3.167(2)  | Bi(2)–I(2)       | 3.177(2)  |
| Bi(2)–I(3)       | 3.288(3)  | Bi(2)–I(7)       | 3.009(2)  |
| Bi(2)–I(8)       | 2.998(2)  | Bi(2)–I(9)       | 2.963(2)  |
| Bi(3)–I(10)      | 3.208(2)  | Bi(3)–I(11)      | 3.253(2)  |
| Bi(3)–I(12)      | 3.205(3)  | Bi(3)–I(13)      | 2.976(2)  |
| Bi(3)–I(14)      | 2.997(2)  | Bi(3)–I(15)      | 2.980(3)  |
| Bi(4A)–I(10)     | 3.265(2)  | Bi(4A)–I(11)     | 3.247(3)  |
| Bi(4A)–I(12)     | 3.199(3)  | Bi(4A)–I(16)     | 2.951(3)  |
| Bi(4A)–I(17)     | 2.975(2)  | Bi(4A)–I(18)     | 2.983(3)  |
| Bi(4B)–I(10)     | 3.252(13) | Bi(4B)–I(11)     | 2.867(11) |
| Bi(4B)–I(12)     | 3.023(13) | Bi(4B)–I(16)     | 3.316(11) |
| Bi(4B)–I(17)     | 3.003(13) | Bi(4B)–I(18)     | 3.148(12) |
| Tb(1)–O(1)       | 2.387(12) | Tb(1)–O(2)       | 2.361(14) |
| Tb(1)–O(3)       | 2.349(14) | Tb(1)–O(4)       | 2.367(13) |
| Tb(1)–O(5)       | 2.437(13) | Tb(1)–O(6)       | 2.343(11) |
| Tb(1)–O(7)       | 2.333(13) | Tb(1)–O(8)       | 2.331(16) |
| Tb(2)–O(9)       | 2.355(13) | Tb(2)–O(10)      | 2.362(14) |
| Tb(2)–O(11)      | 2.456(13) | Tb(2)–O(12)      | 2.345(13) |
| Tb(2)–O(13)      | 2.333(13) | Tb(2)–O(14)      | 2.425(13) |
| Tb(2)–O(15)      | 2.331(12) | Tb(2)–O(16)      | 2.417(14) |
|                  |           |                  |           |
| I(1)–Bi(1)–I(2)  | 81.02(7)  | I(1)–Bi(1)–I(3)  | 84.01(6)  |
| I(1)–Bi(1)–I(4A) | 89.71(7)  | I(1)–Bi(1)–I(4B) | 105.9(4)  |
| I(1)–Bi(1)–I(5A) | 172.60(6) | I(1)–Bi(1)–I(5B) | 161.7(4)  |
| I(1)–Bi(1)–I(6)  | 87.37(8)  | I(2)–Bi(1)–I(3)  | 78.73(7)  |
| I(2)–Bi(1)–I(4A) | 95.09(7)  | I(2)–Bi(1)–I(4B) | 106.7(4)  |
| I(2)–Bi(1)–I(5A) | 93.18(9)  | I(2)–Bi(1)–I(5B) | 106.1(4)  |
| I(2)–Bi(1)–I(6)  | 165.47(4) | I(3)–Bi(1)–I(4A) | 171.78(5) |

|                    |           |                     |           |
|--------------------|-----------|---------------------|-----------|
| I(3)–Bi(1)–I(4B)   | 169.2(5)  | I(3)–Bi(1)–I(5A)    | 90.37(7)  |
| I(3)–Bi(1)–I(5B)   | 81.0(4)   | I(3)–Bi(1)–I(6)     | 91.45(7)  |
| I(4A)–Bi(1)–I(4B)  | 18.8(5)   | I(4A)–Bi(1)–I(5A)   | 95.42(7)  |
| I(4A)–Bi(1)–I(5B)  | 106.1(4)  | I(4A)–Bi(1)–I(6)    | 93.56(7)  |
| I(4B)–Bi(1)–I(5A)  | 80.1(4)   | I(4B)–Bi(1)–I(5B)   | 88.4(6)   |
| I(4B)–Bi(1)–I(6)   | 84.8(3)   | I(5A)–Bi(1)–I(5B)   | 17.9(4)   |
| I(5A)–Bi(1)–I(6)   | 97.61(9)  | I(5B)–Bi(1)–I(6)    | 82.6(4)   |
| I(1)–Bi(2)–I(2)    | 83.52(7)  | I(1)–Bi(2)–I(3)     | 83.85(7)  |
| I(1)–Bi(2)–I(7)    | 174.55(4) | I(1)–Bi(2)–I(8)     | 84.70(7)  |
| I(1)–Bi(2)–I(9)    | 93.20(7)  | I(2)–Bi(2)–I(3)     | 79.23(7)  |
| I(2)–Bi(2)–I(7)    | 93.77(8)  | I(2)–Bi(2)–I(8)     | 167.56(4) |
| I(2)–Bi(2)–I(9)    | 91.19(7)  | I(3)–Bi(2)–I(7)     | 91.01(7)  |
| I(3)–Bi(2)–I(8)    | 95.56(6)  | I(3)–Bi(2)–I(9)     | 170.22(4) |
| I(7)–Bi(2)–I(8)    | 97.63(8)  | I(7)–Bi(2)–I(9)     | 91.58(7)  |
| I(8)–Bi(2)–I(9)    | 93.43(6)  | I(10)–Bi(3)–I(11)   | 80.80(7)  |
| I(10)–Bi(3)–I(12)  | 82.84(6)  | I(10)–Bi(3)–I(13)   | 91.68(8)  |
| I(10)–Bi(3)–I(14)  | 169.78(4) | I(10)–Bi(3)–I(15)   | 87.31(6)  |
| I(11)–Bi(3)–I(12)  | 81.41(7)  | I(11)–Bi(3)–I(13)   | 165.23(4) |
| I(11)–Bi(3)–I(14)  | 88.99(8)  | I(11)–Bi(3)–I(15)   | 99.14(7)  |
| I(12)–Bi(3)–I(13)  | 85.06(7)  | I(12)–Bi(3)–I(14)   | 95.53(6)  |
| I(12)–Bi(3)–I(15)  | 169.93(5) | I(13)–Bi(3)–I(14)   | 98.23(8)  |
| I(13)–Bi(3)–I(15)  | 93.15(7)  | I(14)–Bi(3)–I(15)   | 94.54(6)  |
| I(10)–Bi(4A)–I(11) | 80.03(7)  | I(10)–Bi(4A)–I(12)  | 82.04(7)  |
| I(10)–Bi(4A)–I(16) | 87.97(7)  | I(10)–Bi(4A)–I(17)  | 173.57(6) |
| I(10)–Bi(4A)–I(18) | 93.72(8)  | I(11)–Bi(4A)–I(12)  | 81.58(7)  |
| I(11)–Bi(4A)–I(16) | 165.70(5) | I(11)–Bi(4A)–I(17)  | 96.01(8)  |
| I(11)–Bi(4A)–I(18) | 89.55(7)  | I(12)–Bi(4A)–I(16)  | 89.12(7)  |
| I(12)–Bi(4A)–I(17) | 92.40(8)  | I(12)–Bi(4A)–I(18)  | 170.70(6) |
| I(16)–Bi(4A)–I(17) | 95.21(8)  | I(16)–Bi(4A)–I(18)  | 99.03(7)  |
| I(17)–Bi(4A)–I(18) | 91.30(8)  | I(10)–Bi(4B)–I(11)  | 86.1(3)   |
| I(10)–Bi(4B)–I(12) | 85.0(3)   | I(10)–Bi(4B)–I(16)  | 82.3(3)   |
| I(10)–Bi(4B)–I(17) | 169.8(4)  | I(10)–Bi(4B)–I(18)  | 90.9(3)   |
| I(11)–Bi(4B)–I(12) | 91.3(3)   | I(11)–Bi(4B)–I(16)  | 168.3(5)  |
| I(11)–Bi(4B)–I(17) | 104.1(4)  | I(11)–Bi(4B)–I(18)  | 93.7(4)   |
| I(12)–Bi(4B)–I(16) | 85.7(3)   | I(12)–Bi(4B)–I(17)  | 95.4(4)   |
| I(12)–Bi(4B)–I(18) | 173.4(4)  | I(16)–Bi(4B)–I(17)  | 87.5(3)   |
| I(16)–Bi(4B)–I(18) | 88.5(3)   | I(17)–Bi(4B)–I(18)  | 87.6(3)   |
| Bi(1)–I(1)–Bi(2)   | 82.74(8)  | Bi(1)–I(2)–Bi(2)    | 81.70(7)  |
| Bi(1)–I(3)–Bi(2)   | 80.92(8)  | Bi(1)–I(4A)–Bi(4B)  | 78.2(10)  |
| Bi(1)–I(4B)–Bi(4A) | 83.0(10)  | Bi(1)–I(5A)–Bi(5B)  | 91.0(9)   |
| Bi(1)–I(5B)–Bi(5A) | 71.1(9)   | Bi(3)–I(10)–Bi(4A)  | 82.00(8)  |
| Bi(3)–I(10)–Bi(4B) | 75.3(2)   | Bi(4A)–I(10)–Bi(4B) | 7.26(18)  |

|                     |          |                     |          |
|---------------------|----------|---------------------|----------|
| Bi(4A)–I(11)–Bi(4B) | 3.0(3)   | Bi(3)–I(11)–Bi(4A)  | 81.57(7) |
| Bi(3)–I(11)–Bi(4B)  | 80.0(3)  | Bi(4A)–I(12)–Bi(4B) | 6.9(2)   |
| Bi(3)–I(12)–Bi(4A)  | 83.07(8) | Bi(3)–I(12)–Bi(4B)  | 78.5(2)  |
| Bi(4A)–I(16)–Bi(4B) | 3.5(2)   | Bi(4A)–I(17)–Bi(4B) | 7.9(2)   |
| Bi(4A)–I(18)–Bi(4B) | 7.1(2)   | O(1)–Tb(1)–O(2)     | 75.1(5)  |
| O(1)–Tb(1)–O(3)     | 77.1(5)  | O(1)–Tb(1)–O(4)     | 72.7(4)  |
| O(1)–Tb(1)–O(5)     | 116.9(5) | O(1)–Tb(1)–O(6)     | 72.7(4)  |
| O(1)–Tb(1)–O(7)     | 144.2(5) | O(1)–Tb(1)–O(8)     | 141.9(5) |
| O(2)–Tb(1)–O(3)     | 71.4(5)  | O(2)–Tb(1)–O(4)     | 78.7(5)  |
| O(2)–Tb(1)–O(5)     | 140.9(5) | O(2)–Tb(1)–O(6)     | 141.5(5) |
| O(2)–Tb(1)–O(7)     | 119.0(5) | O(2)–Tb(1)–O(8)     | 75.2(6)  |
| O(3)–Tb(1)–O(4)     | 141.9(5) | O(3)–Tb(1)–O(5)     | 145.4(5) |
| O(3)–Tb(1)–O(6)     | 81.4(5)  | O(3)–Tb(1)–O(7)     | 77.2(5)  |
| O(3)–Tb(1)–O(8)     | 114.7(6) | O(4)–Tb(1)–O(5)     | 71.1(5)  |
| O(4)–Tb(1)–O(6)     | 110.4(5) | O(4)–Tb(1)–O(7)     | 139.5(5) |
| O(4)–Tb(1)–O(8)     | 78.6(5)  | O(5)–Tb(1)–O(6)     | 74.1(5)  |
| O(5)–Tb(1)–O(7)     | 74.4(5)  | O(5)–Tb(1)–O(8)     | 75.0(6)  |
| O(6)–Tb(1)–O(7)     | 79.1(4)  | O(6)–Tb(1)–O(8)     | 142.4(5) |
| O(7)–Tb(1)–O(8)     | 72.5(5)  | O(9)–Tb(2)–O(10)    | 72.5(5)  |
| O(9)–Tb(2)–O(11)    | 74.4(5)  | O(9)–Tb(2)–O(12)    | 80.7(5)  |
| O(9)–Tb(2)–O(13)    | 141.5(5) | O(9)–Tb(2)–O(14)    | 142.3(5) |
| O(9)–Tb(2)–O(15)    | 116.2(5) | O(9)–Tb(2)–O(16)    | 74.3(5)  |
| O(10)–Tb(2)–O(11)   | 74.9(5)  | O(10)–Tb(2)–O(12)   | 142.0(4) |
| O(10)–Tb(2)–O(13)   | 82.2(5)  | O(10)–Tb(2)–O(14)   | 142.2(5) |
| O(10)–Tb(2)–O(15)   | 74.2(4)  | O(10)–Tb(2)–O(16)   | 115.0(5) |
| O(11)–Tb(2)–O(12)   | 72.3(4)  | O(11)–Tb(2)–O(13)   | 71.3(4)  |
| O(11)–Tb(2)–O(14)   | 120.5(5) | O(11)–Tb(2)–O(15)   | 141.7(4) |
| O(11)–Tb(2)–O(16)   | 141.8(4) | O(12)–Tb(2)–O(13)   | 104.4(5) |
| O(12)–Tb(2)–O(14)   | 73.0(5)  | O(12)–Tb(2)–O(15)   | 143.2(4) |
| O(12)–Tb(2)–O(16)   | 81.7(5)  | O(13)–Tb(2)–O(14)   | 72.6(4)  |
| O(13)–Tb(2)–O(15)   | 82.7(5)  | O(13)–Tb(2)–O(16)   | 143.9(4) |
| O(14)–Tb(2)–O(15)   | 75.1(4)  | O(14)–Tb(2)–O(16)   | 75.6(5)  |
| O(15)–Tb(2)–O(16)   | 73.1(5)  |                     |          |

**Table S5.** Hydrogen Bond Lengths (Å) and Angles (deg) for **1**.

| D–H···A                                                                                                                                                             | d(H···A) | d(D···A) | <(DHA) |
|---------------------------------------------------------------------------------------------------------------------------------------------------------------------|----------|----------|--------|
| C(2)–H(2C)···I(8)#1                                                                                                                                                 | 3.296    | 3.891    | 121.43 |
| C(6)–H(6A)···I(1)                                                                                                                                                   | 3.326    | 4.203    | 151.20 |
| C(6)–H(6A)···I(2)                                                                                                                                                   | 3.181    | 3.784    | 121.90 |
| C(10)–H(10)···I(8)#2                                                                                                                                                | 3.036    | 3.970    | 172.65 |
| C(12)–H(12C)···I(6)#2                                                                                                                                               | 3.023    | 3.953    | 160.94 |
| C(14)–H(14A)···I(7)#3                                                                                                                                               | 3.206    | 3.991    | 139.12 |
| C(14)–H(14C)···I(8)#2                                                                                                                                               | 3.260    | 4.152    | 153.68 |
| C(16)–H(16)···I(5)                                                                                                                                                  | 3.284    | 4.179    | 159.89 |
| C(18)–H(18C)···I(5)                                                                                                                                                 | 3.185    | 4.119    | 162.24 |
| C(20)–H(20A)···I(8)#2                                                                                                                                               | 3.213    | 4.156    | 164.44 |
| C(21)–H(21C)···I(6)#4                                                                                                                                               | 3.214    | 3.808    | 121.19 |
| C(23)–H(23A)···I(9)#5                                                                                                                                               | 3.196    | 4.052    | 147.99 |
| C(23)–H(23B)···I(4)#6                                                                                                                                               | 3.329    | 3.893    | 119.00 |
| Symmetry transformations used to generate equivalent atoms: #1 -x+1, -y+1, -z+1; #2 -x, -y+1, -z+1; #3 x-1, y, z; #4 -x, -y, -z+1; #5 -x+1, -y, -z+1; #6 x, y, z-1. |          |          |        |

**Table S6.** Hydrogen Bond Lengths (Å) and Angles (deg) for **2**.

| D–H···A                | d(H···A) | d(D···A) | <(DHA) |
|------------------------|----------|----------|--------|
| C(1)–H(1)···I(1)#1     | 3.284    | 4.153    | 156.37 |
| C(4)–H(4)···I(3)       | 3.276    | 4.102    | 149.09 |
| C(6)–H(6A)···I(3)      | 3.282    | 4.176    | 155.76 |
| C(8)–H(8A)···I(3)      | 3.283    | 4.009    | 133.88 |
| C(9)–H(9A)···I(5)#2    | 3.280    | 3.997    | 132.98 |
| C(9)–H(9B)···I(7)#1    | 3.236    | 4.146    | 158.85 |
| C(12A)–H(12C)···I(6)#2 | 3.280    | 3.986    | 131.89 |
| C(15)–H(15A)···I(4)#3  | 3.203    | 4.148    | 168.46 |
| C(16)–H(16)···I(2)#3   | 3.313    | 3.976    | 130.12 |
| C(17)–H(17B)···I(2)#4  | 3.196    | 4.133    | 165.89 |
| C(19)–H(19)···I(2)#3   | 3.307    | 4.153    | 152.31 |
| C(21B)–H(21A)···I(9)#5 | 3.326    | 4.719    | 146.59 |
| C(21A)–H(21B)···I(7)#5 | 3.179    | 4.000    | 144.50 |
| C(21B)–H(21B)···I(7)#5 | 3.179    | 3.994    | 169.12 |
| C(21A)–H(21C)···I(7)#3 | 3.180    | 3.889    | 132.00 |
| C(21B)–H(21C)···I(7)#3 | 3.180    | 4.174    | 166.99 |
| C(24)–H(24B)···I(9)#4  | 3.222    | 4.158    | 165.41 |



|                                                                                                                                                                       |       |       |        |
|-----------------------------------------------------------------------------------------------------------------------------------------------------------------------|-------|-------|--------|
| C(24)–H(24C)···I(9)#5                                                                                                                                                 | 3.240 | 4.150 | 158.98 |
| Symmetry transformations used to generate equivalent atoms: #1 x+1, y, z; #2 -x+1, y-1/2, -z+1/2; #3 x+1, -y+3/2, z+1/2; #4 x, -y+3/2, z+1/2; #5 -x+1, y+1/2, -z+1/2. |       |       |        |

**Table S7.** Hydrogen Bond Lengths (Å) and Angles (deg) for **3**.

| D–H···A                 | d(H···A) | d(D···A) | <(DHA) |
|-------------------------|----------|----------|--------|
| C(5)–H(5C)···I(5B)#2    | 2.712    | 3.635    | 161.33 |
| C(8)–H(8C)···I(15)#3    | 3.302    | 4.024    | 133.61 |
| C(11)–H(11B)···O(9)#1   | 2.624    | 3.504    | 152.61 |
| C(12)–H(12B)···I(12)#1  | 3.043    | 3.799    | 136.65 |
| C(15)–H(15A)···I(15)#4  | 3.193    | 4.041    | 148.25 |
| C(15)–H(15C)···I(16)#3  | 3.258    | 4.217    | 176.70 |
| C(16)–H(16)···I(10)#3   | 3.188    | 3.946    | 139.96 |
| C(17A)–H(17A)···I(4A)#4 | 3.165    | 4.093    | 163.00 |
| C(17B)–H(17B)···I(2)#4  | 3.328    | 4.002    | 145.12 |
| C(17A)–H(17C)···I(12)#3 | 3.068    | 3.979    | 158.85 |
| C(17A)–H(17D)···I(2)#4  | 3.142    | 3.729    | 137.16 |
| C(17B)–H(17D)···I(2)#4  | 3.142    | 4.002    | 149.98 |
| C(17B)–H(17F)···I(12)#3 | 3.271    | 4.167    | 156.05 |
| C(19)–H(19)···I(10)#3   | 3.157    | 4.056    | 163.12 |
| C(20)–H(20B)···I(13)#4  | 3.160    | 3.940    | 139.48 |
| C(22)–H(22)···I(3)#2    | 3.229    | 4.137    | 165.86 |
| C(23B)–H(23A)···I(8)#2  | 3.268    | 3.784    | 151.17 |
| C(23A)–H(23C)···I(7)#2  | 3.108    | 3.958    | 148.37 |
| C(23B)–H(23D)···I(11)#1 | 3.044    | 3.815    | 138.33 |
| C(25)–H(25)···I(1)#5    | 3.130    | 3.970    | 151.15 |
| C(26)–H(26C)···I(8)#6   | 3.329    | 4.076    | 136.16 |
| C(27)–H(27B)···I(7)#6   | 3.283    | 3.854    | 119.99 |
| C(32A)–H(32A)···I(7)#2  | 3.326    | 4.019    | 130.78 |
| C(32A)–H(32D)···N(13)   | 2.566    | 3.868    | 174.90 |
| C(32B)–H(32D)···N(13)   | 2.566    | 3.421    | 135.67 |
| C(33)–H(33B)···I(13)#4  | 3.182    | 3.994    | 143.40 |
| C(35)–H(35B)···I(10)#3  | 3.165    | 4.016    | 148.72 |
| C(35)–H(35C)···I(8)#5   | 3.258    | 4.012    | 136.76 |
| C(39)–H(39A)···I(3)#2   | 3.292    | 4.024    | 134.50 |
| C(39)–H(39A)···I(7)#2   | 3.148    | 3.900    | 136.41 |
| C(41)–H(41B)···I(4B)    | 3.103    | 4.010    | 158.07 |
| C(44)–H(44C)···I(2)#2   | 3.257    | 4.071    | 143.75 |
| C(47)–H(47B)···I(4A)#5  | 3.329    | 4.274    | 168.45 |
| C(48)–H(48A)···I(4B)    | 2.905    | 3.681    | 138.67 |

Symmetry transformations used to generate equivalent atoms: #1  $x-1/2, -y+1/2, z+1/2$ ; #2  $-x+1, -y+1, -z+1$ ; #3  $x+1/2, -y+1/2, z+1/2$ ; #4  $-x+3/2, y-1/2, -z+3/2$ ; #5  $-x+2, -y+1, -z+1$ ; #6  $x, y-1, z$ .

**Table S8.** Summary of Catalytic Activities of Some Iodobismuthate Hybrids with Different Cations in Photodegradation of Organic

| Compounds                                                                                                                                      | organic dyes   | light source  | irradiation time | band gaps of hybrids | degradation ratio | Ref. |
|------------------------------------------------------------------------------------------------------------------------------------------------|----------------|---------------|------------------|----------------------|-------------------|------|
| $(\text{CH}_3\text{NH}_3)_3\text{Bi}_2\text{I}_9$                                                                                              | $^e\text{MB}$  | halogen lamp  | 120 min          | 1.94 eV              | 83%               | 1    |
|                                                                                                                                                | $^d\text{RhB}$ | halogen lamp  | 120 min          | 1.94 eV              | 97%               |      |
| $^a [\text{Me}_3\text{TPT}]_2[\text{Bi}_6\text{I}_{24}]$                                                                                       | $^e\text{MO}$  | Xe lamp       | 50 min           | 2.07 eV              | 93%               | 2    |
| $(\text{MePh}_3\text{P})_3[\text{Bi}_3\text{I}_{12}]$                                                                                          | MB             | UV light      | 60 min           | 1.97 eV              | 62%               | 3    |
| $(\text{Ph}_4\text{P})_3[\text{Bi}_3\text{I}_{12}]$                                                                                            | MB             | UV light      | 60 min           | 2.08 eV              | 55%               |      |
| $^b \{[\text{did}](\text{Bi}_2\text{I}_8)(\text{BiI}_5)\}$                                                                                     | MB             | Xe lamp       | 150 min          | 2.82 eV              | 51%               | 4    |
| $\{[(\text{BiI}_6)\text{I}_{13}] \cdot 2\text{I}_3 \cdot (\text{H-BPA})_4\}_n$                                                                 | RhB            | Xe lamp       | 120 min          | 2.64 eV              | 92%               | 5    |
| $[\text{NH}_4][\text{Ni}(\text{phen})_3]\text{BiI}_6$                                                                                          | $^f\text{CV}$  | visible-light | 25 min           | 2.09 eV              | 100%              | 6    |
| $[\text{Ti}_{12}\text{O}_{15}(\text{O}^i\text{Pr})_{17}]_3[\text{Bi}_3\text{I}_{12}]$                                                          | RhB            | Xe lamp       | 30 min           | 2.15 eV              | 90%               | 7    |
| $[\text{Ti}_{12}\text{O}_{14}(\text{O}^i\text{Pr})_{18}][\text{Bi}_4\text{I}_{14}(\text{THF})_2]$                                              | RhB            | Xe lamp       | 30 min           | 2.03 eV              | 97%               |      |
| $[\text{Ti}_{12}\text{O}_{14}(\text{O}^i\text{Pr})_{18}][\text{Ti}_{11}\text{BO}_{14}(\text{O}^i\text{Pr})_{17}] - [\text{Bi}_6\text{I}_{22}]$ | RhB            | Xe lamp       | 30 min           | 1.95 eV              | 94%               |      |

$^a$  TPT = 2,4,6-tri(4-pyridyl)-1,3,5-triazine,  $^b$  did =  $\text{did}^{2+} = (1^2z, 5^2z)-1^1\text{H}, 5^1\text{H}-1, 5(1, 3)\text{-diimidazol-3-iuma-3, 7(1,2)-dibenzenacyclooctaphane-1}^3, 5^3\text{-dium}$ ,  $^e\text{MB}$  = methylene blue,  $^d\text{RhB}$  = rhodamine B,  $^e\text{MO}$  = methyl orange,  $^f\text{CV}$  = crystal violet.

## Reference

- B. M. Bresolina, S. B. Hammoudaa and M. Sillanpää, *J. Photochem. Photobiol. A.*, 2019, **376**, 116–126.
- X. F. Yin, B. D. Ge, L. Wei, X. X. Zheng, Y. L. Wang, Q. Wei and G. M. Wang, *Inorg. Chem. Commun.*, 2019, **108**, 107516.
- M. A. Moyet, S. M. Kanan, H. M. Varney, N. Abu-Farha, D. B. Gold, W. J. Lain, R. D. Pike, H. H. Patterson. *Res. Chem. Intermed.*, 2019, **45**, 5919–5933.
- Y. Y. Li, M. Xiao, D. H. Wei and Y. Y. Niu, *ACS Omega.*, 2019, **4**, 5137–5146.
- X. Q. Zhuang, Q. Q. Wu, X. H. Huang, H. H. Li, T. J. Lin and Y. L. Gao. *Catalysts.*, 2021, **11**, 640.
- X. C. Ren, J. Li, W. H. Wang, X. Chen, B. Zhang and L. Z. Li, *Inorg. Chem. Commun.*, 2021, **130**, 108714.
- M. Y. Fu, H. Y. Wang, H. L. Zhai, Q. Y. Zhu and J. Dai, *Inorg. Chem.*, 2021, **60**, 9589-9597.

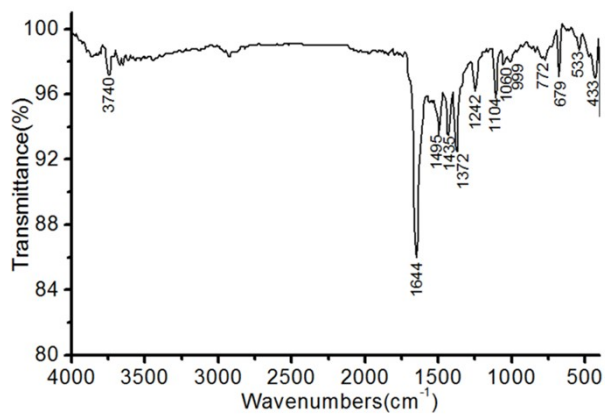

**Fig. S1** IR spectrum of 1.

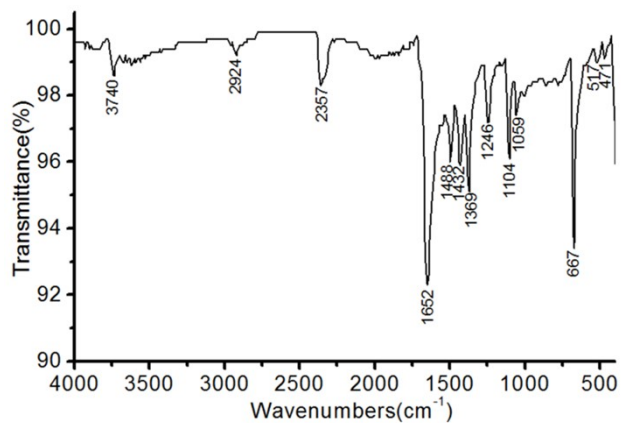

**Fig. S2** IR spectrum of 2.

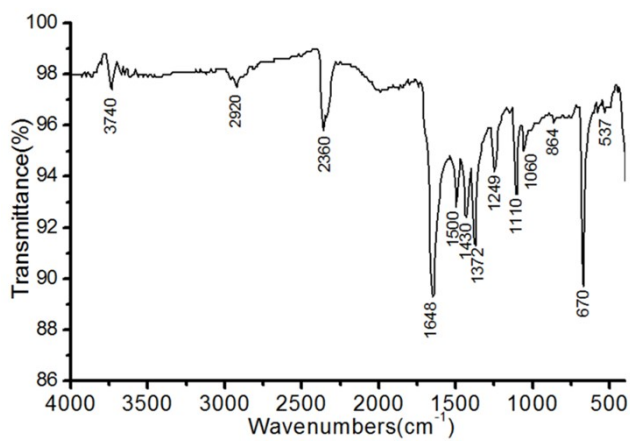

**Fig. S3** IR spectrum of 3.

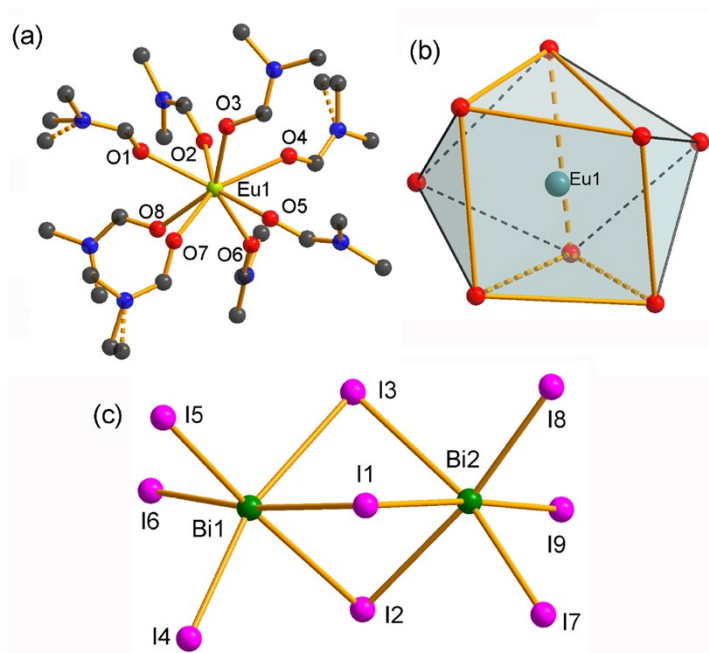

**Fig. S4** Structural diagrams for **2**: (a)  $[\text{Eu}(\text{DMF})_8]^{3+}$  cation, (b) distorted bicapped triangular prism  $\text{EuO}_8$  of  $[\text{Eu}(\text{DMF})_8]^{3+}$ , and (c)  $[\text{Bi}_2\text{I}_9]^{3-}$  anion.

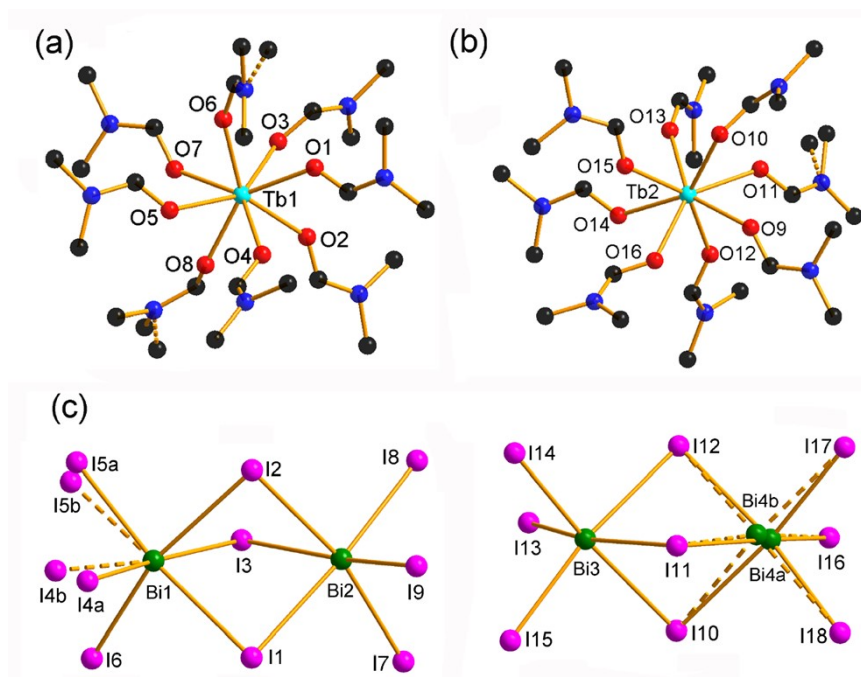

**Fig. S5** Structural diagrams of  $[\text{Tb}(\text{DMF})_8]^{3+}$  cations (a, b), and  $[\text{Bi}_2\text{I}_9]^{3-}$  anions (c) for **3**.

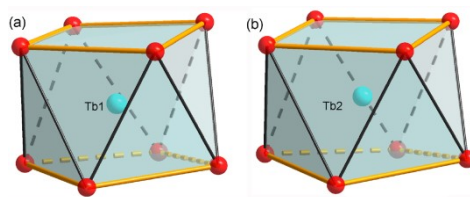

**Fig. S6** Distorted square antiprisms  $TbO_8$  of  $[Tb(1)(DMF)_8]^{3+}$  (a), and  $[Tb(2)(DMF)_8]^{3+}$  (b) in compound **3**.

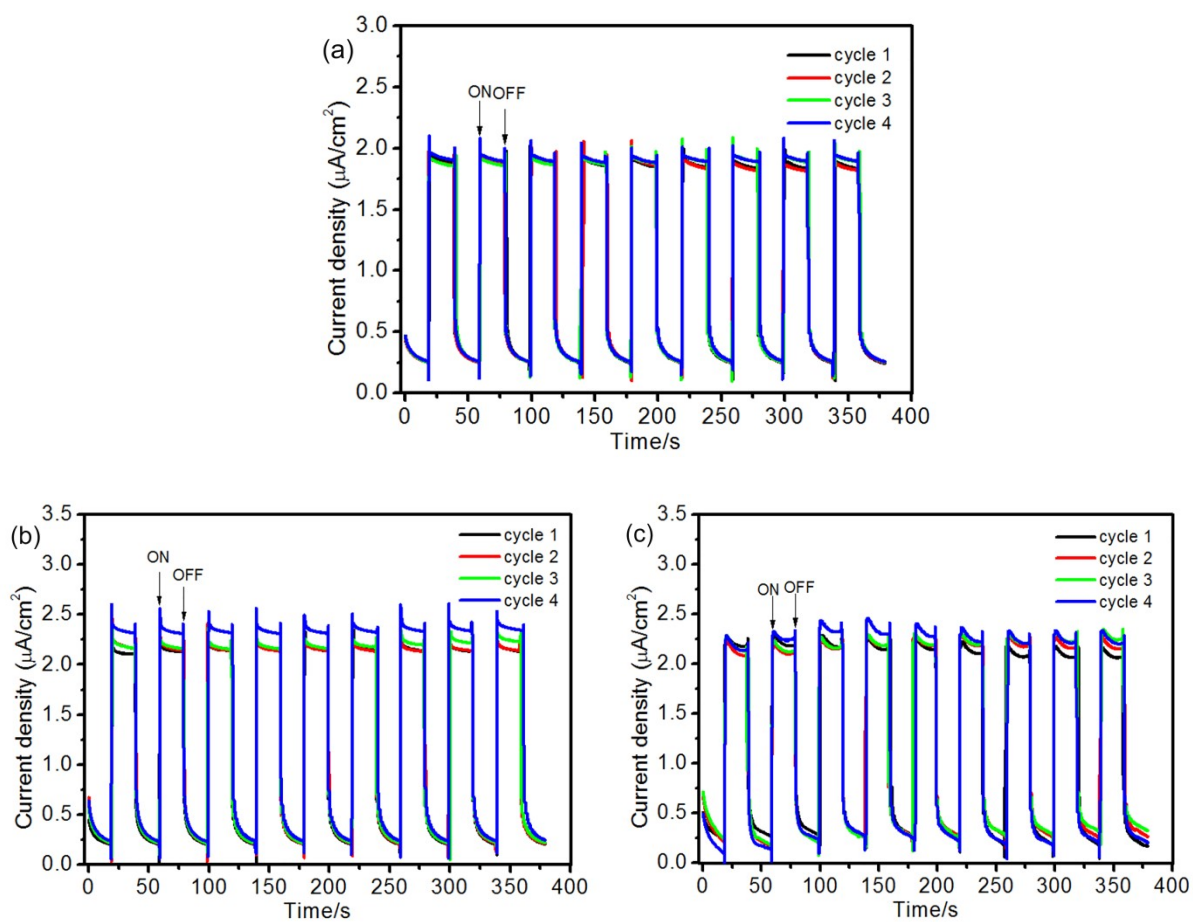

**Fig. S7** Photocurrent responses of four successive measurements on compounds **1** (a), **2** (b), and **3** (c).

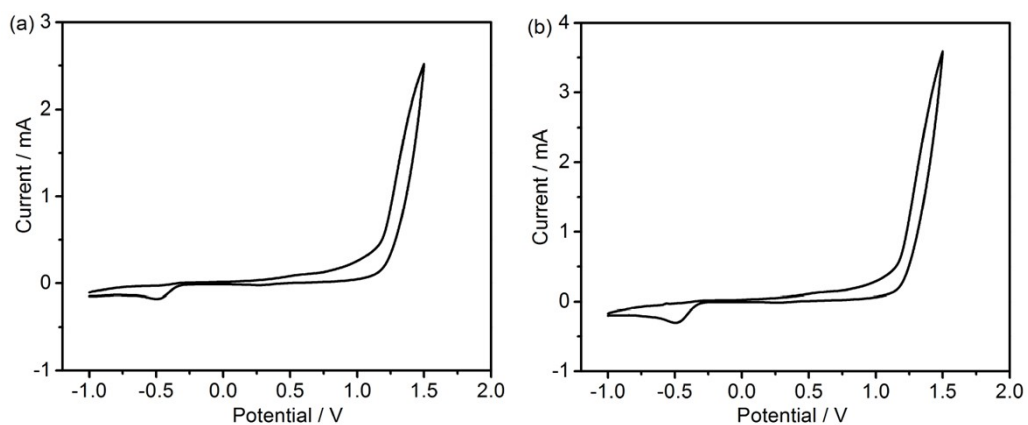

**Fig. S8** Cyclic voltammograms of blank (a), and compound 1 (b) in DMF solution with a scan rate of 50 mV/s

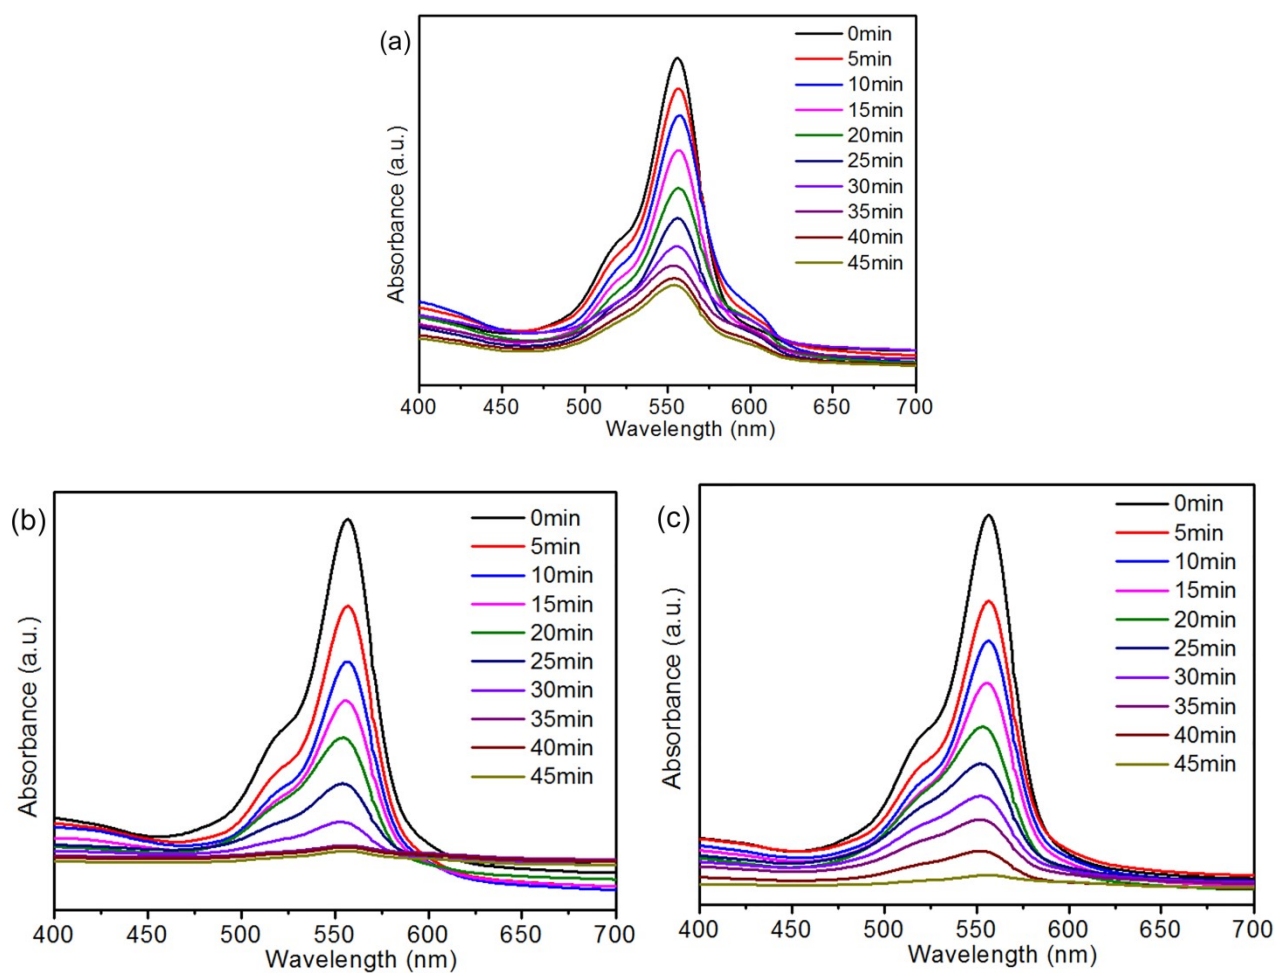

**Fig. S9** Time dependent absorption spectra of RhB solutions in photodegradation reactions over compounds 1 (a), 2 (b) and 3 (c).

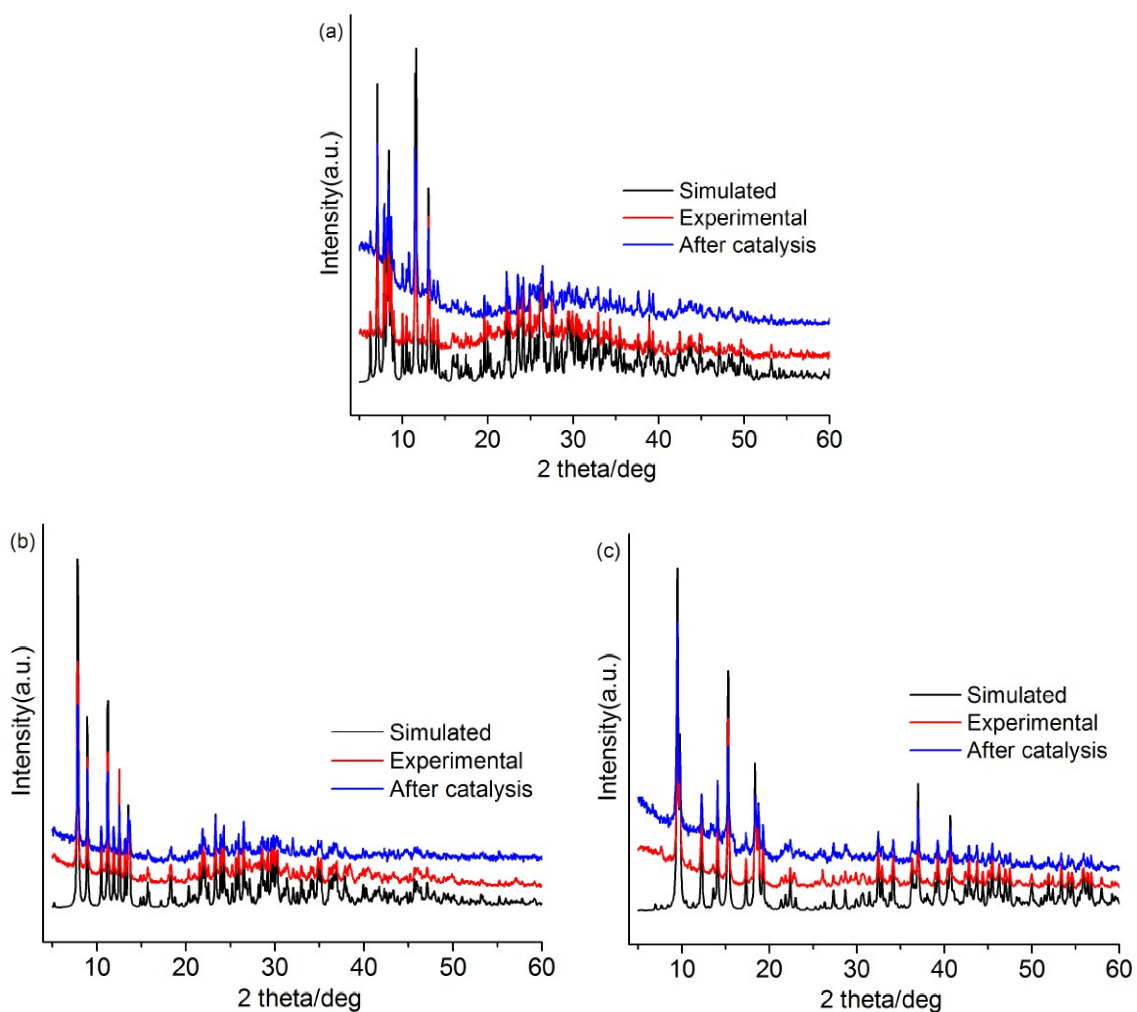

**Fig. S10** Simulated and experimental powder XRD patterns, and experimental powder XRD pattern after photocatalysis for compound **1** (a), **2** (b) and **3**(c).

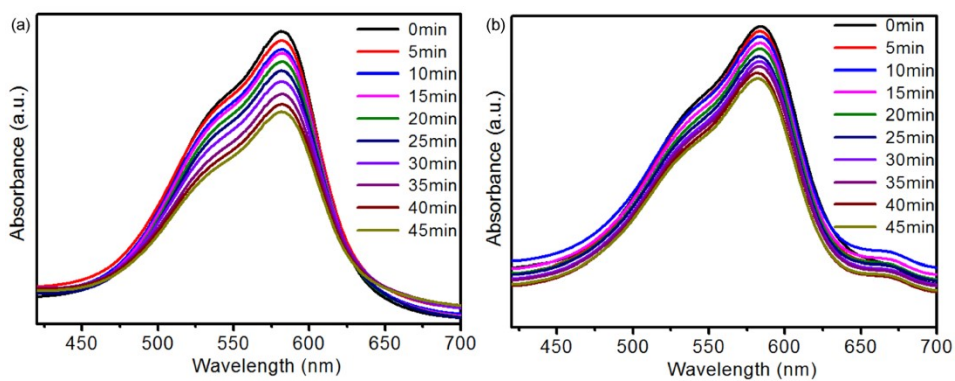

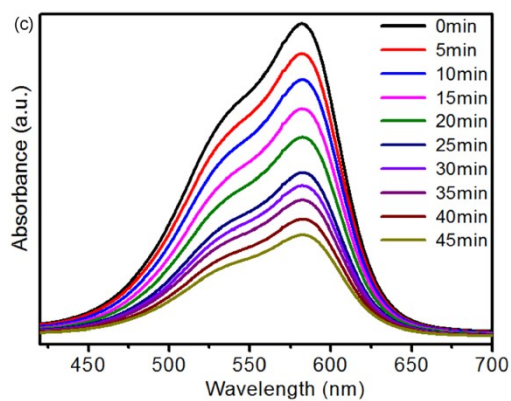

**Fig. S11** Time dependent absorption spectra of CV solution with photodegradation catalyzed by compound **2** in the presence of radical quenching agents BQ (a), AO (b), and TBA (c).

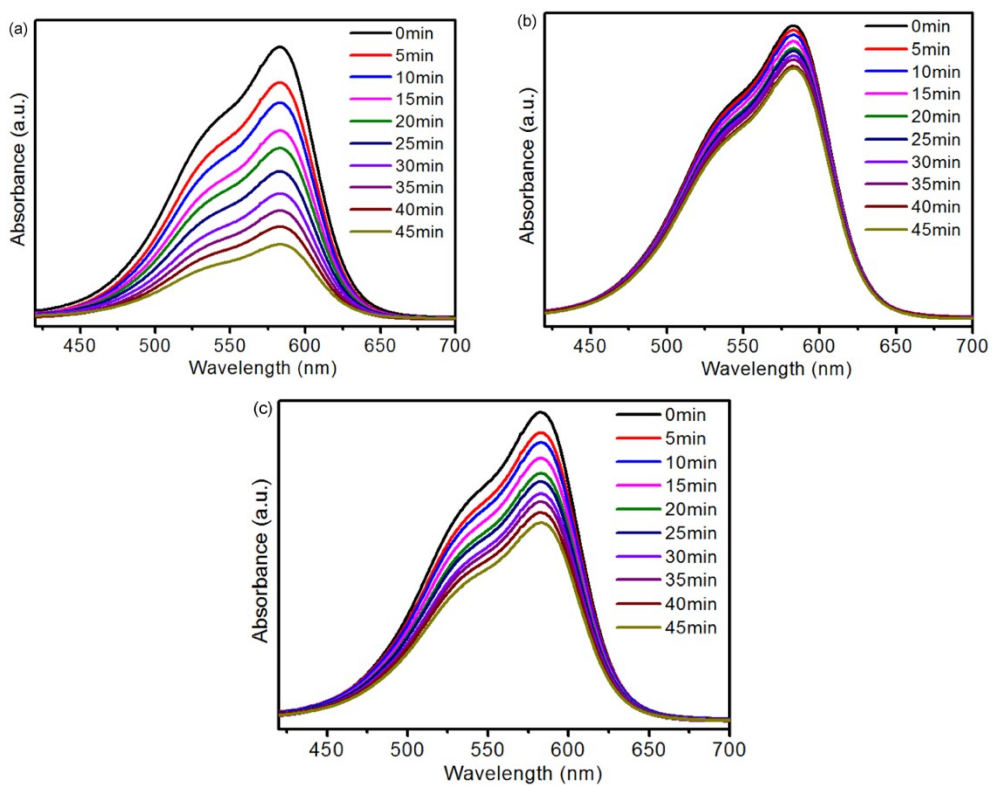

**Fig. S12** Time dependent absorption spectra of CV solution with photodegradation catalyzed by compound **3** in the presence of radical quenching agents BQ (a), AO (b), and TBA (c).



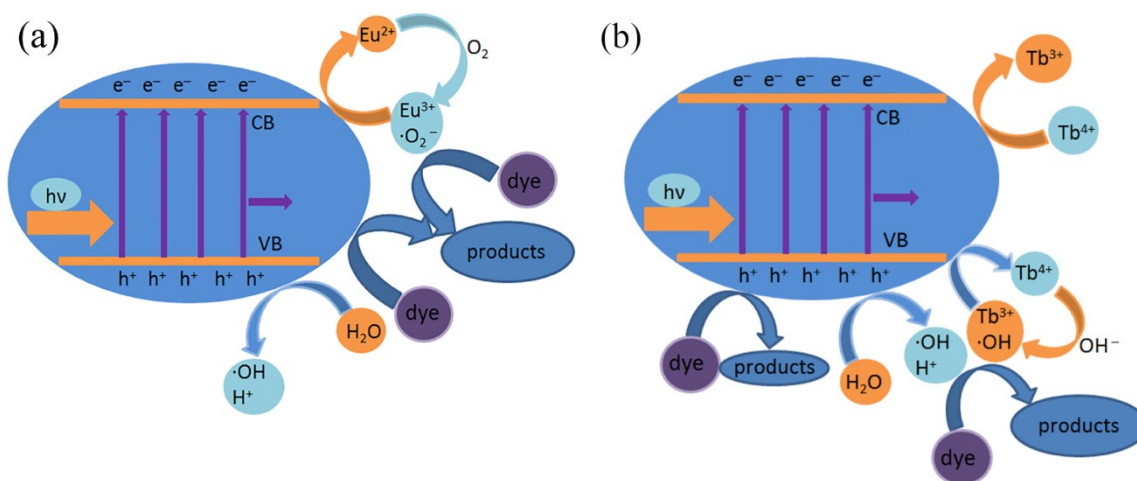

**Fig. S13.** Schematic diagrams illustrating the photocatalytic mechanism for CV degradation over **2** (a) and **3** (b) under visible light irradiation.
